# Supplementary material for: Methodology of assessment and reporting of safety in anti-malarial treatment efficacy studies of uncomplicated falciparum malaria in pregnancy: a systematic literature review
Source: Springer Nature journal article supplement (doi:10.1186/s12936-017-2136-x), 2017-12-01
Supplement: MOESM2 [file 15315546]

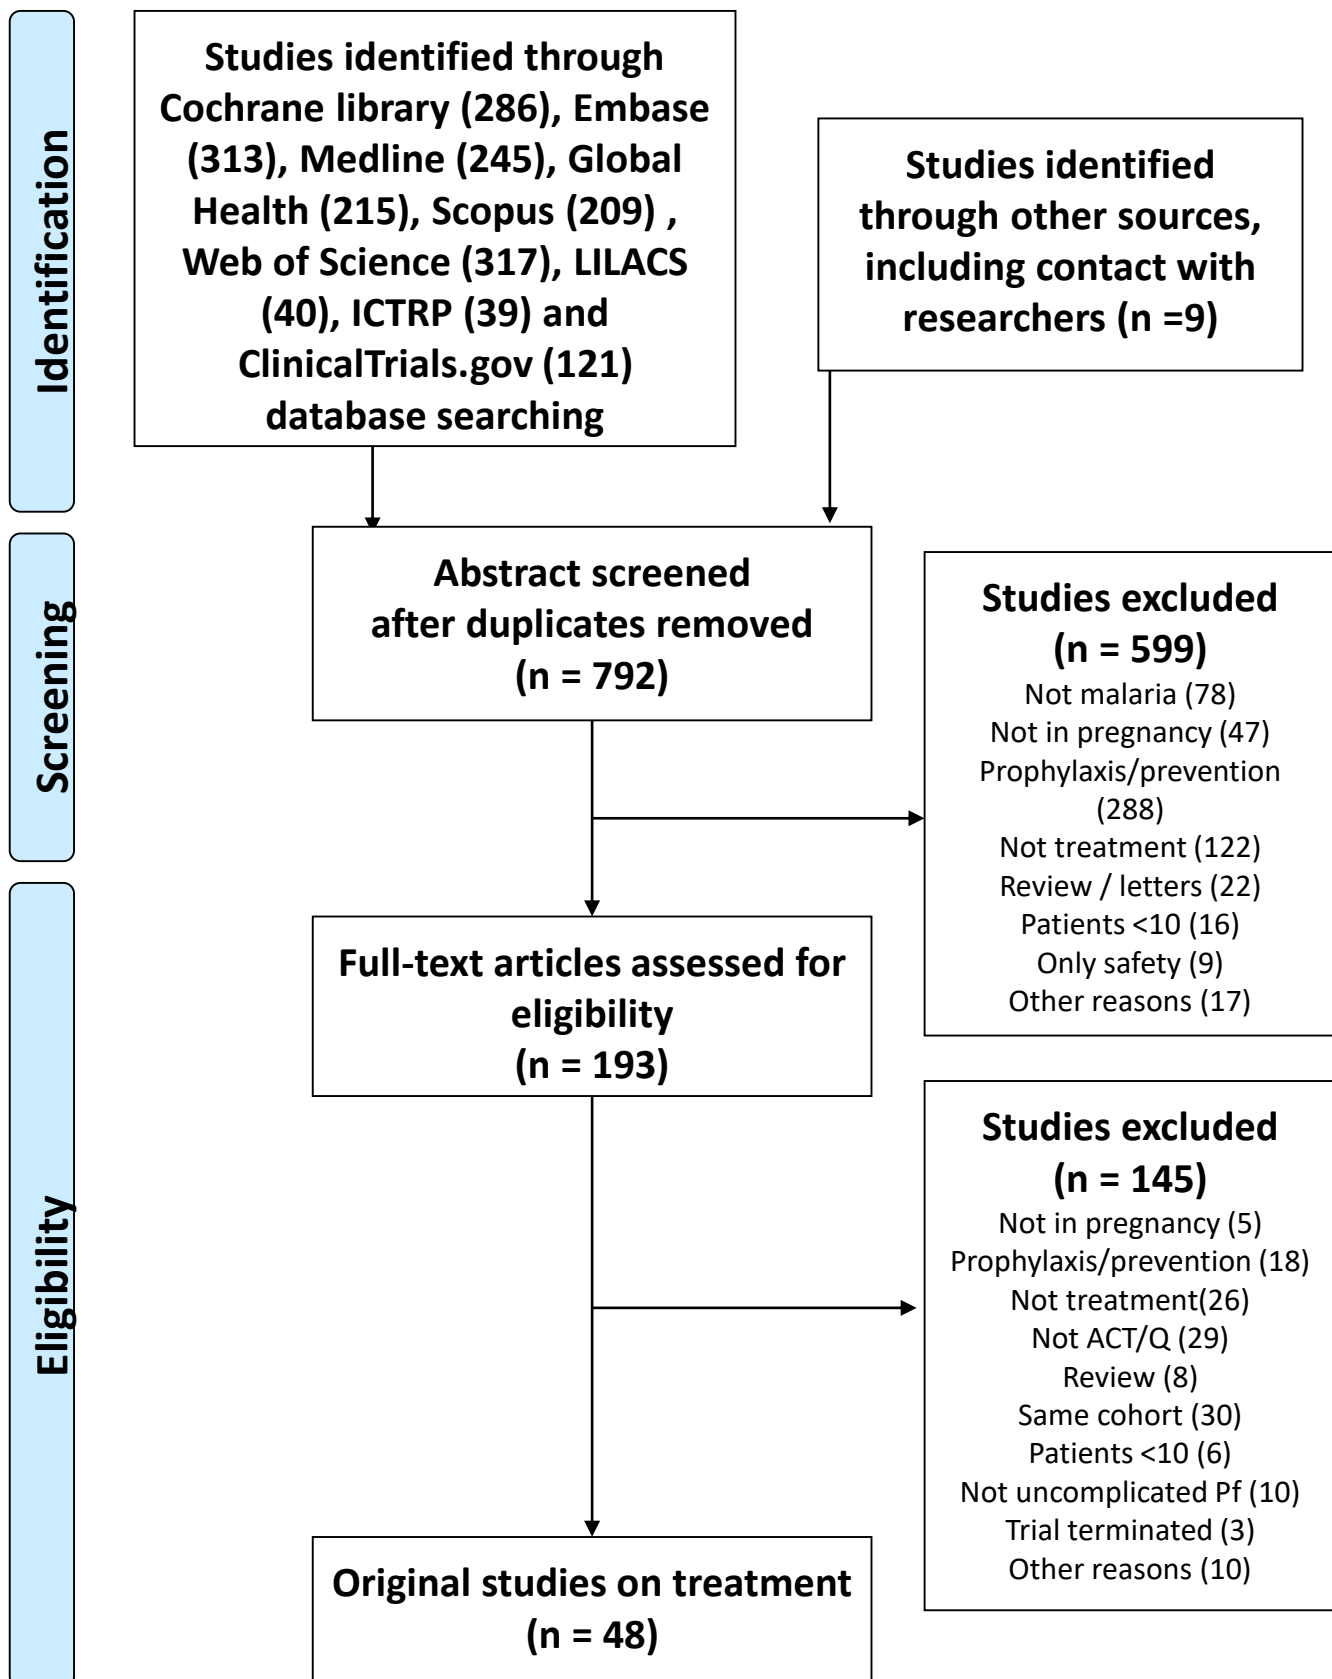

Additional file 2. The flowchart of the systematic literature search on treatment efficacy of uncomplicated falciparum malaria in pregnancy is shown according to the PRISMA statement.
