# Supplementary material for: Methodology of assessment and reporting of safety in anti-malarial treatment efficacy studies of uncomplicated falciparum malaria in pregnancy: a systematic literature review
Source: Springer Nature journal article supplement (doi:10.1186/s12936-017-2136-x), 2017-12-01
Supplement: MOESM3 [file 15315546]

Additional file 3 Summary of the study design and reported outcomes.

| Study Country Study year                        | Study design Treatment: N            | Trimester | Estimation of gestational age | Parity or gravidity reported | Follow up until delivery | Length of follow-up after delivery | ECG          | Blood test                                                                                                                                                       | Pregnancy outcomes reported                                                                                                                                                           |
|-------------------------------------------------|--------------------------------------|-----------|-------------------------------|------------------------------|--------------------------|------------------------------------|--------------|------------------------------------------------------------------------------------------------------------------------------------------------------------------|---------------------------------------------------------------------------------------------------------------------------------------------------------------------------------------|
| Naing, 1988 Myanmar 1985-1986 [26]              | RCT<br>Q: 23<br>AQ: 19               | 2,3       | Not specified                 | Parity                       | Weekly                   | Not followed                       | Not reported | Routine blood test was carried out, but the results were not reported.                                                                                           | Stillbirth/miscarriage<br>Preterm birth<br>Neonatal mortality                                                                                                                         |
| Harinasuta, 1990 <sup>a</sup> Thailand INA [27] | RCT<br>Q: 82<br>MFQ: 85              | 1,2,3     | Not specified                 | INA                          | Yes                      | 6 months                           | INA          | Blood glucose                                                                                                                                                    | Stillbirth/miscarriage<br>Preterm birth<br>Low birth weight (%)<br>Congenital abnormality<br>Child development (6 months)                                                             |
| Nosten, 1993 Thailand 1989-1990 [28]            | RCT<br>Q5: 16<br>Q5 + spiramycin: 16 | 2,3       | Not specified                 | Parity                       | Not followed             | Not followed                       | Not reported | WBC count at baseline                                                                                                                                            | Stillbirth/miscarriage during the treatment                                                                                                                                           |
| Sowunmi, 1998 Nigeria 1994-1997 [29]            | RCT<br>AM: 23<br>AMMQ: 22            | 2,3       | Ultrasound                    | Parity                       | 3-6 weekly               | 3 years                            | Not reported | Total WBC count, platelet count, ALT, AST, bilirubin, sodium, potassium, chloride, bicarbonate, uric acid, creatinine and blood glucose at baseline and on day 7 | Stillbirth/miscarriage<br>Preterm birth<br>Congenital abnormality<br>Birth weight<br>Child development                                                                                |
| Bounyasong, 2001 Thailand 1995-1998 [30]        | RCT<br>ASMQ: 29<br>Q: 28             | 2,3       | Fundal height + ultrasound    | Parity                       | Weekly                   | 2 years                            | Not reported | CBC at baseline and daily during the study period, but not reported. Blood glucose.                                                                              | Calcification of placenta<br>Intra-uterine growth restriction<br>Estimated gestational age at delivery<br>Birth weight<br>Congenital abnormality<br>Child development (up to 2 years) |

Additional file 3 continued.

| Study Country Study year                | Study design Treatment: N                        | Trimester | Estimation of gestational age         | Parity or gravidity reported | Follow up until delivery | Length of follow-up after delivery | ECG          | Blood test      | Pregnancy outcomes reported                                                                                                                                                                                                                         |
|-----------------------------------------|--------------------------------------------------|-----------|---------------------------------------|------------------------------|--------------------------|------------------------------------|--------------|-----------------|-----------------------------------------------------------------------------------------------------------------------------------------------------------------------------------------------------------------------------------------------------|
| McGready, 2000 Thailand 1995-1997 [31]  | RCT<br>Q: 42<br>ASMQ: 66                         | 2,3       | Fundal height + Dubowitz              | Parity                       | Weekly                   | 1 year                             | Not reported | Not reported    | Stillbirth/miscarriage<br>Estimated gestational age at delivery<br>Birth weight / low birth weight (%)<br>Placental weight<br>Congenital abnormality<br>Child development<br>Neonatal mortality / Infantile mortality<br>Maternal mortality         |
| McGready, 2001a Thailand 1997-2000 [32] | RCT<br>QC: 65<br>AS: 64                          | 2,3       | Fundal height + Dubowitz              | Parity                       | Weekly                   | 1 year                             | Not reported | Not reported    | Stillbirth/miscarriage<br>Estimated gestational age at delivery<br>Birth weight / low birth weight (%)<br>Congenital abnormality<br>Placental weight<br>Neonatal mortality / infantile mortality<br>Child development                               |
| McGready, 2005 Thailand 2001-2003 [33]  | RCT<br>AAP: 39<br>Q: 42                          | 2,3       | Ultrasound, Dubowitz or Fundal height | Gravidity                    | Weekly                   | 1 year                             | Not reported | CBC at baseline | Stillbirth/miscarriage<br>Estimated gestational age at delivery<br>Birth weight / low birth weight (%)<br>Height, head circumference, arm circumference<br>Congenital abnormality<br>Infantile mortality<br>Child development<br>Maternal mortality |
| Adam, 2004a Sudan 2002-2003 [34]        | RCT<br>Q (low dose): 18<br>Q (standard dose): 24 | 2,3       | Not specified                         | Parity                       | Yes                      | Not followed                       | Not reported | Blood glucose   | Preterm birth<br>Perinatal mortality                                                                                                                                                                                                                |

Additional file 3 continued.

| Study Country Study year                          | Study design Treatment: N                             | Trimester | Estimation of gestational age | Parity or gravidity reported | Follow up until delivery                    | Length of follow-up after delivery | ECG             | Blood test                                                                                                                                 | Pregnancy outcomes reported                                                                                                                                                                                                                                                                     |
|---------------------------------------------------|-------------------------------------------------------|-----------|-------------------------------|------------------------------|---------------------------------------------|------------------------------------|-----------------|--------------------------------------------------------------------------------------------------------------------------------------------|-------------------------------------------------------------------------------------------------------------------------------------------------------------------------------------------------------------------------------------------------------------------------------------------------|
| Kalilani, 2007<br>Malawi<br>2003-2004<br>[35]     | RCT<br>ASSP: 47<br>SP: 47<br>SP +<br>azithromycin: 47 | 2         | Ballard score                 | Gravidity                    | Yes                                         | Not followed                       | Not reported    | Not reported                                                                                                                               | Anaemia at delivery<br>Stillbirth/miscarriage<br>Preterm birth<br>Birth weight and low birth weight<br>Congenital abnormality<br>Neonatal death                                                                                                                                                 |
| McGready, 2008<br>Thailand<br>2004-2006<br>[36]   | RCT<br>AL: 125<br>AS: 128                             | 2,3       | Ultrasound or<br>Dubowitz     | Both                         | Weekly                                      | 1 year                             | Yes (subset)    | CBC and biochemistry at<br>baseline and on day 14<br>(subset of patients)                                                                  | Stillbirth/miscarriage<br>Estimated gestational age at delivery<br>Birth weight / low birth weight (%)<br>Height, head circumference, arm<br>circumference<br>Congenital abnormality<br>Neonatal neurological test<br>Neonatal / Infantile mortality<br>Child development<br>Maternal mortality |
| Mutabingwa, 2009<br>Tanzania<br>2004-2006<br>[37] | RCT<br>ASAQ: 83<br>AQSP: 80<br>CD: 81<br>SP: 28       | 2,3       | Dubowitz                      | Parity                       | At delivery<br>and 42d<br>after<br>delivery | 6 weeks                            | Yes             | Total WBC count with<br>differential, platelet<br>count, creatinine, total<br>bilirubin, ALT and<br>albumin at baseline, on<br>day 3 and 7 | Stillbirth/miscarriage<br>Preterm birth<br>Birth weight<br>Congenital abnormality<br>Placenta weight<br>Maternal mortality                                                                                                                                                                      |
| Kaye, 2008<br>Uganda<br>2006<br>[38]              | RCT<br>AL: 57<br>CD: 57                               | 2,3       | Not specified                 | Gravidity                    | Not<br>followed                             | Not followed                       | Not<br>reported | Not reported                                                                                                                               | None                                                                                                                                                                                                                                                                                            |

Additional file 3 continued.

| Study Country Study year                                                              | Study design Treatment: N                           | Trimester | Estimation of gestational age       | Parity or gravidity reported | Follow up until delivery | Length of follow-up after delivery | ECG          | Blood test                                                                                                                                | Pregnancy outcomes reported                                                                                                                                                              |
|---------------------------------------------------------------------------------------|-----------------------------------------------------|-----------|-------------------------------------|------------------------------|--------------------------|------------------------------------|--------------|-------------------------------------------------------------------------------------------------------------------------------------------|------------------------------------------------------------------------------------------------------------------------------------------------------------------------------------------|
| Piola, 2010<br>Uganda<br>2006-2009<br>[39]                                            | RCT<br>AL: 152<br>Q: 152                            | 2,3       | Ultrasound or LMP                   | Gravidity                    | Weekly                   | 1 year                             | Yes          | Creatinine, ALT and bilirubin at baseline, on day 7, 14 and 42. CBC at baseline, on day 14 and 42                                         | Stillbirth/miscarriage<br>Preterm birth / gestational age at delivery<br>Birth weight / low birth weight (%)<br>Congenital abnormality<br>Early neonatal mortality<br>Maternal mortality |
| Carmona-Fonseca, 2013<br>Colombia<br>2008-2011<br>[40]                                | RCT<br>AL: 15<br>ASMQ: 15                           | 2,3       | Not specified                       | Gravidity                    | Not followed             | Not followed                       | Not reported | Creatinine, AST, ALT, direct and indirect bilirubin, and platelet 24 hours after the treatment                                            | Maternal mortality                                                                                                                                                                       |
| D'Alessandro, 2016<br>Burkina Faso, Ghana, Malawi and Zambia<br>2010-2013<br>[41, 42] | RCT<br>AL: 880<br>ASMQ: 842<br>ASMQ: 848<br>DP: 853 | 2,3       | Fundal height + New Ballard score   | Gravidity                    | Monthly                  | 1 year                             | Not reported | Total WBC count with differential at baseline, on day 7, 14, 28 and 63. Total bilirubin, ALT and creatinine at baseline, on day 7 and 14. | Stillbirth/miscarriage<br>Preterm birth<br>Birth weight<br>Congenital abnormality<br>Maternal mortality                                                                                  |
| Osarfo, 2017<br>Ghana<br>2011-2012<br>[43]                                            | RCT<br>ASMQ: 205<br>DP: 212                         | 2,3       | ultrasound (or Ballard if not done) | Parity                       | Yes                      | 6 weeks                            | Not reported | CBC at baseline, on day 14, 28 and 42                                                                                                     | Stillbirth/miscarriage<br>Preterm birth<br>Birth weight / low birth weight<br>Congenital abnormality<br>Neonatal mortality and morbidity<br>Maternal mortality                           |

Additional file 3 continued.

| Study Country Study year                                        | Study design Treatment: N                  | Trimester | Estimation of gestational age               | Parity or gravidity reported | Follow up until delivery           | Length of follow-up after delivery | ECG          | Blood test                                                                                    | Pregnancy outcomes reported                                                                                                                                            |
|-----------------------------------------------------------------|--------------------------------------------|-----------|---------------------------------------------|------------------------------|------------------------------------|------------------------------------|--------------|-----------------------------------------------------------------------------------------------|------------------------------------------------------------------------------------------------------------------------------------------------------------------------|
| Onyamboko, 2015 <sup>a</sup><br>DRC<br>2013-2014<br>[44]        | RCT<br>AL: 48<br>AL5: 48                   | 2,3       | Ultrasound                                  | INA                          | Yes                                | 1 year                             | INA          | Biochemistry                                                                                  | Stillbirth/miscarriage<br>Congenital abnormality<br>Neonatal mortality<br>Child development                                                                            |
| Ukah, 2015<br>Nigeria<br>2013<br>[45]                           | RCT<br>AL: 75<br>ASAQ: 75                  | 2,3       | Not specified                               | Parity                       | Telephone confirmation after birth | Not followed                       | Not reported | Not reported                                                                                  | Stillbirth/miscarriage                                                                                                                                                 |
| Iribhogbe, 2017a<br>Nigeria<br>INA<br>[46]                      | RCT<br>AL: 40<br>ASAQ: 40                  | 2,3       | Not specified                               | Both                         | No                                 | No                                 | Not reported | Differential WBC count, total and conjugated bilirubin, ALT, AST, ALP, cholesterol) on day 4. | None                                                                                                                                                                   |
| CTRI/2009/091/001055 <sup>b</sup><br>India<br>2010-2015<br>[47] | RCT<br>ASMQ (500)<br>ASSP (500)            | 2,3       | INA                                         | INA                          | Yes                                | 42 days                            | INA          | Biochemistry                                                                                  | Birth outcomes<br>Congenital abnormality                                                                                                                               |
| NCT01054248 <sup>b</sup><br>Thailand<br>2010-2016<br>[48]       | RCT<br>AL4 (335)<br>ASMQ (335)<br>DP (335) | 2,3       | Ultrasound (Dubowitz, LMP or fundal height) | Both                         | Yes                                | 1 year                             | INA          | Full biochemistry and CBC at baseline, on day 0, 14 and 28 (subset of the patients)           | Stillbirth/miscarriage<br>Preterm birth<br>Congenital abnormality<br>Birth weight / low birth weight (%)<br>Neonatal and infant mortality<br>Child development         |
| McGready, 2003a<br>Thailand<br>2000-2001<br>[49]                | PK<br>AAP: 24                              | 2,3       | Fundal height + Dubowitz                    | Both                         | Weekly                             | Not followed                       | Yes          | CBC and blood glucose at baseline. Biochemistry at baseline and 72 h after treatment          | Stillbirth/miscarriage<br>Estimated gestational age at delivery / preterm birth<br>Birth weight / low birth weight (%)<br>Congenital abnormality<br>Maternal mortality |

Additional file 3 continued.

| Study Country Study year                | Study design Treatment: N                                | Trimester | Estimation of gestational age | Parity or gravidity reported | Follow up until delivery | Length of follow-up after delivery | ECG          | Blood test                                                                                                     | Pregnancy outcomes reported                                                                                                                                           |
|-----------------------------------------|----------------------------------------------------------|-----------|-------------------------------|------------------------------|--------------------------|------------------------------------|--------------|----------------------------------------------------------------------------------------------------------------|-----------------------------------------------------------------------------------------------------------------------------------------------------------------------|
| Adam, 2012 Sudan 2007-2008 [50]         | PK study DP: 12 (control: 12 matched non-pregnant women) | 2,3       | LMP+ ultrasound               | Parity                       | Weekly                   | 1 year                             | Not reported | Urea, AST and ALT at baseline and on day 14                                                                    | Stillbirth/miscarriage<br>Preterm birth<br>Birth weight<br>Congenital abnormality<br>Child development (up to 1 year)                                                 |
| Onyamboko, 2011 DRC 2007-2008 [51]      | PK ASSP: 26 (control: 25 non-pregnant women)             | 2,3       | Ultrasound                    | Parity                       | Yes                      | 1 year                             | Not reported | Creatinine, albumin, ALT, AST and alpha-1-acid glycoprotein at baseline and after the first dose of artesunate | Stillbirth/miscarriage<br>Birth weight / low birth weight (%)<br>Congenital abnormality<br>Child development (1 year)                                                 |
| McGready, 2012 Thailand 2008-2009 [52]  | PK AS: 20                                                | 2,3       | Ultrasound                    | Both                         | Weekly                   | 1 year                             | Not reported | CBC and biochemistry at baseline                                                                               | Stillbirth/miscarriage<br>Estimated gestational age at delivery / preterm birth<br>Birth weight / low birth weight (%)<br>Congenital abnormality<br>Child development |
| Rijken, 2011 Thailand 2008 [53]         | PK DP: 24 (control: 24 matched non-pregnant women)       | 2,3       | Ultrasound                    | Both                         | Weekly                   | 1 months                           | Not reported | CBC and biochemistry at baseline and on day 14                                                                 | Stillbirth/miscarriage<br>Congenital abnormality<br>Neonatal mortality                                                                                                |
| Valea, 2014 Burkina Faso 2008-2009 [54] | PK ASMQ: 24 (control: 24 non-pregnant women)             | 2,3       | LMP or fundal height          | Parity                       | Passive follow-up        | Not followed                       | Not reported | Total WBC count, total bilirubin, ALT, AST, creatinine at baseline and on day 14                               | Stillbirth/miscarriage<br>Birth weight / low birth weight (%)<br>Congenital abnormality                                                                               |

Additional file 3 continued.

| Study Country Study year                                | Study design Treatment: N                              | Trimester | Estimation of gestational age | Parity or gravidity reported | Follow up until delivery | Length of follow-up after delivery | ECG             | Blood test                                                                                                     | Pregnancy outcomes reported                                                                                                                  |
|---------------------------------------------------------|--------------------------------------------------------|-----------|-------------------------------|------------------------------|--------------------------|------------------------------------|-----------------|----------------------------------------------------------------------------------------------------------------|----------------------------------------------------------------------------------------------------------------------------------------------|
| Juma, 2014 <sup>a</sup><br>Kenia<br>2012<br>[55]        | PK<br>AL: 45<br>(control: 25<br>non-pregnant<br>women) | 2,3       | Not specified                 | INA                          | Not<br>followed          | Not followed                       | INA             | Not reported                                                                                                   | Not planned                                                                                                                                  |
| Mosha, 2014<br>Tanzania<br>2012<br>[56]                 | PK<br>AL: 33                                           | 2,3       | LMP + fundal<br>height        | No                           | Not<br>followed          | Not followed                       | Not<br>reported | WBC count with<br>differential, platelet<br>count, creatinine, ALT<br>and AST at baseline, on<br>day 14 and 28 | Stillbirth/miscarriage within 42 days                                                                                                        |
| Nyunt, 2016<br>Uganda<br>2013-2014<br>[57]              | PK<br>AL: 30<br>(control: 30 non<br>pregnant adults)   | 2,3       | LMP +<br>ultrasound           | No                           | Not<br>followed          | Not followed                       | Not<br>reported | Not reported                                                                                                   | None                                                                                                                                         |
| Mutagonda,<br>2017<br>Tanzania<br>2014-2015<br>[58, 59] | PK<br>AL: 60                                           | 2,3       | Not specified                 | Gravidity                    | Not<br>followed          | Not followed                       | Not<br>reported | Urea, creatinine,<br>albumin and bilirubin at<br>baseline                                                      | None                                                                                                                                         |
| Adam, 2004b<br>Sudan<br>2000-2002<br>[60]               | Single-arm<br>Q: 26                                    | 1         | Ultrasound                    | Parity                       | Every 2<br>weeks         | 1 year                             | Not<br>reported | Urea, creatinine,<br>albumin and bilirubin at<br>baseline                                                      | Stillbirth/miscarriage<br>Preterm birth<br>Birth weight<br>Congenital abnormality<br>Child development (up to 1 year)<br>Infantile mortality |

Additional file 3 continued.

| Study Country Study year                         | Study design Treatment: N | Trimester | Estimation of gestational age | Parity or gravidity reported | Follow up until delivery | Length of follow-up after delivery | ECG          | Blood test                                                                                                                                | Pregnancy outcomes reported                                                                                                                                                               |
|--------------------------------------------------|---------------------------|-----------|-------------------------------|------------------------------|--------------------------|------------------------------------|--------------|-------------------------------------------------------------------------------------------------------------------------------------------|-------------------------------------------------------------------------------------------------------------------------------------------------------------------------------------------|
| Adam, 2004c Sudan 1997-2001 [61]                 | Single-arm AM im: 28      | 1,2,3     | Ultrasound                    | Parity                       | Every 2 weeks            | 1 year                             | Not reported | Urea, creatinine, albumin and bilirubin at baseline                                                                                       | Stillbirth/miscarriage<br>Preterm birth<br>Birth weight<br>Head circumference<br>Congenital abnormality<br>Child development (up to 1 year)<br>Perinatal mortality<br>Maternal mortality  |
| Adegnika, 2005 Gabon 2003-2004 [62]              | Single-arm Q: 50          | 2,3       | Not specified                 | Both                         | Monthly                  | Not followed                       | Not reported | Not reported                                                                                                                              | None                                                                                                                                                                                      |
| Adam, 2006 Sudan 2004-2005 [63]                  | Single-arm ASSP: 32       | 2,3       | Ultrasound                    | Parity                       | Every 2 weeks            | 1 month                            | Not reported | Not reported                                                                                                                              | Stillbirth/miscarriage<br>Preterm birth<br>Birth weight<br>Head circumference<br>Congenital abnormality<br>Child development (up to 1 month)<br>Perinatal mortality<br>Maternal mortality |
| Ndiaye, 2011 <sup>a</sup> Senegal 2009-2011 [64] | Single-arm ASAQ: 28       | 2,3       | Fundal height + Dubowitz      | INA                          | At delivery              | 9 months                           | Not reported | WBC count with differential, creatinine, ALT, and bilirubin at baseline, on day 7, 14, 28, 42 and at delivery. Blood glucose at baseline. | Stillbirth/miscarriage<br>Gestational age at delivery<br>Birth weight / low birth weight<br>Height<br>Congenital abnormality<br>Child development (up to 9 months)<br>Perinatal mortality |



Additional file 3 continued.

| <b>Study Country Study year</b>                  | <b>Study design Treatment: N</b>                      | <b>Trimester</b> | <b>Estimation of gestational age</b> | <b>Parity or gravidity reported</b> | <b>Follow up until delivery</b> | <b>Length of follow-up after delivery</b> | <b>ECG</b>   | <b>Blood test</b>                                                                                 | <b>Pregnancy outcomes reported</b>                                                                                                                                         |
|--------------------------------------------------|-------------------------------------------------------|------------------|--------------------------------------|-------------------------------------|---------------------------------|-------------------------------------------|--------------|---------------------------------------------------------------------------------------------------|----------------------------------------------------------------------------------------------------------------------------------------------------------------------------|
| Iribhogbe, 2017b<br>Nigeria<br>INA<br>[65]       | Single-arm<br>ASAQ: 42                                | 2,3              | Not specified                        | Both                                | No                              | No                                        | Not reported | WBC count with differential, total and conjugated bilirubin, ALT, AST, ALP, cholesterol) on day 4 | None                                                                                                                                                                       |
| McGready, 1998a<br>Thailand<br>1992-1996<br>[66] | Observational cohort<br>AS: 55<br>AMMQ: 2<br>ASMQ: 23 | 1,2,3            | LMP + fundal height + Dubowitz       | No                                  | Weekly                          | 1-2 year                                  | Not reported | Not reported                                                                                      | Stillbirth/miscarriage<br>Gestational age at delivery<br>Congenital abnormality<br>Child development                                                                       |
| McGready, 1998b<br>Thailand<br>1991-1996<br>[67] | Observational cohort<br>Q: 204                        | 1,2,3            | Dubowitz or LMP                      | Gravidity                           | Weekly                          | Not followed                              | Not reported | Total WBC count and platelet count at baseline                                                    | Stillbirth/miscarriage<br>Gestational age at delivery<br>Birth weight<br>Congenital abnormality                                                                            |
| McGready, 2001b<br>Thailand<br>1992-2000<br>[68] | Observational cohort<br>artemisinins:<br>539          | 1,2,3            | Fundal height + Dubowitz or LMP      | Both                                | Weekly                          | Not followed                              | Not reported | Not reported                                                                                      | Stillbirth/miscarriage<br>Estimated gestational age at delivery<br>Birth weight / low birth weight (%)<br>Congenital abnormality<br>Placental weight<br>Maternal mortality |



Additional file 3 continued.

| Study Country Study year                          | Study design Treatment: N            | Trimester | Estimation of gestational age          | Parity or gravidity reported | Follow up until delivery | Length of follow-up after delivery | ECG          | Blood test   | Pregnancy outcomes reported                                                                                                                                                                            |
|---------------------------------------------------|--------------------------------------|-----------|----------------------------------------|------------------------------|--------------------------|------------------------------------|--------------|--------------|--------------------------------------------------------------------------------------------------------------------------------------------------------------------------------------------------------|
| Rijken, 2008<br>Thailand<br>2006-2007<br>[73]     | Observational cohort<br>DP: 62       | 1,2,3     | Not specified                          | Both                         | Weekly                   | 1 month                            | Not reported | Not reported | Stillbirth/miscarriage<br>Preterm birth<br>Birth weight / low birth weight (%)<br>Congenital abnormality<br>Neonatal mortality                                                                         |
| Rulisa, 2012<br>Rwanda<br>2007-2009<br>[74]       | Observational cohort<br>AL: (1072) † | 1,2,3     | LMP + fundal height + ultrasound(some) | Both                         | Monthly                  | Not specified                      | Not reported | Not reported | Stillbirth/miscarriage<br>Preterm birth<br>Birth weight<br>Length, head circumference<br>Congenital abnormality<br>Neonatal mortality<br>Maternal mortality                                            |
| Kalilani, 2013<br>Malawi<br>2009-2010<br>[75, 76] | Observational cohort<br>AL: 56       | 1,2       | LMP + fundal height + Ballard score    | Gravidity                    | Monthly                  | 14weeks                            | Not reported | Not reported | Anaemia at delivery<br>Stillbirth/miscarriage<br>Estimated gestational age at delivery / preterm birth (%)<br>Birth weight / low birth weight (%)<br>/ small for gestational age (%)<br>Neonatal death |

AAP: artesunate-atovaquone-proguanil, AC: artesunate-clindamycin, AL: artemether-lumefantrine, ALT: alanine aminotransferase, AQ: amodiaquine, AS: artesunate, AST: aspartate aminotransferase, CBC: complete blood count, CD: chlorproguanil-Dapsone, CHQ: chloroquine, DP: dihydroartemisinin(DHA)-piperaquine(PPQ), DRC: Democratic Republic of Congo, ECG: electrocardiography, LMP: last menstrual period, MQ: mefloquine, N: number of pregnant women who completed the follow-up, NA: data not available, PCR: polymerase chain reaction, PK: pharmacokinetic study, Q: quinine, QC: quinine-clindamycin, RCT: randomised controlled trial, SP: sulfadoxine-pyrimethamine. WBC: white blood cell.

† This number includes patients without parasitological confirmation. The exact number of parasitologically confirmed patients is not known. ‡ This study included patients enrolled in other studies. <sup>a</sup>: Conference abstract. <sup>b</sup>: Registered clinical trial. Planned number of participants is shown. NCT01054248 included *P. vivax* cases.
