# Supplementary material for: Methodology of assessment and reporting of safety in anti-malarial treatment efficacy studies of uncomplicated falciparum malaria in pregnancy: a systematic literature review
Source: Springer Nature journal article supplement (doi:10.1186/s12936-017-2136-x), 2017-12-01
Supplement: MOESM5 [file 15315546]

Additional file 5 Definition and reporting of fetal losses and prematurity of newborns.

| Study                   | Miscarriage                                                      |          | Stillbirth      |          | EGA    | Prematurity (preterm)                           |         | Perinatal death |        | Neonatal death                            |        |
|-------------------------|------------------------------------------------------------------|----------|-----------------|----------|--------|-------------------------------------------------|---------|-----------------|--------|-------------------------------------------|--------|
|                         | Definition                                                       | Report   | Definition      | Report   | Report | Definition                                      | Report  | Definition      | Report | Definition                                | Report |
| Naing, 1988 [26]        | NR                                                               | Yes      | NR              | NR       | NR     | NR                                              | Yes     | NR              | NR     | NR                                        | Yes    |
| Harinasuta, 1990 [27]   | INA                                                              | Yes (0)* | INA             | Yes (0)* | NR     | INA                                             | Yes     | INA             | INA    | INA                                       | INA    |
| Sowunmi, 1998 [29]      | NR                                                               | Yes (0)* | NR              | Yes (0)* | NR     | NR                                              | Yes (0) | NR              | NR     | NR                                        | NR     |
| Bounyasong, 2001 [30]   | NR                                                               | Yes (0)* | NR              | Yes (0)* | Yes    | NR                                              | NR      | NR              | NR     | NR                                        | NR     |
| McGready, 2000 [31]     | NR                                                               | Yes      | NR              | Yes (0)  | Yes    | <37w                                            | NR      | NR              | NR     | NR                                        | Yes‡   |
| McGready, 2001a [32]    | NR                                                               | Yes (0)  | NR              | Yes      | Yes    | <37w                                            | NR      | NR              | NR     | NR                                        | Yes‡   |
| McGready, 2005 [33]     | <28w                                                             | Yes (0)  | ≥28w            | Yes      | Yes    | <37w                                            | Yes     | NR              | NR     | NR                                        | Yes‡   |
| Adam, 2004a [34]        | NR                                                               | NR       | NR              | NR       | NR     | <37w                                            | Yes     | NR              | NR     | NR                                        | Yes    |
| Kalilani, 2007 [35]     | <28w                                                             | Yes (0)  | ≥28w            | Yes      | Yes    | <37w                                            | NR      | Yes‡            | Yes    | ≤27 days of life                          | Yes    |
| McGready, 2008 [36]     | NR                                                               | Yes      | NR              | Yes      | Yes    | <37w                                            | Yes     | NR              | NR     | 0-32 days                                 | Yes‡   |
| Mutabingwa, 2009 [37]   | NR                                                               | NR       | NR              | Yes      | NR     | NR                                              | NR      | NR              | NR     | NR                                        | Yes    |
| Piola, 2010 [39]        | <20w (spontaneous abortions)<br>>20w (intrauterine fetal deaths) | Yes      | >21w (protocol) | Yes      | Yes    | Prematurity (<37w)<br>Severe prematurity (<28w) | Yes     | NR              | NR     | early neonatal death (1 week after birth) | Yes    |
| D'Alessandro, 2016 [41] | NR                                                               | Yes      | NR              | Yes      | NR     | <37w                                            | Yes     | NR              | NR     | NR                                        | NR     |
| Osarfo, 2017 [43]       | <28w                                                             | Yes      | ≥28w            | Yes      | NR     | <37w                                            | Yes     | NR              | NR     | NR                                        | Yes    |
| Onyamboko, 2015 [44]    | INA                                                              | INA      | INA             | Yes      | NR     | INA                                             | INA     | INA             | INA    | INA                                       | Yes    |
| Ukah, 2015 [45]         | NR                                                               | Yes      | NR              | Yes      | NR     | NR                                              | NR      | NR              | NR     | NR                                        | NR     |

Additional file 5 continued

| Study                     | Miscarriage |          | Stillbirth |          | EGA    | Prematurity (preterm) |         | Perinatal death                           |        | Neonatal death |         |
|---------------------------|-------------|----------|------------|----------|--------|-----------------------|---------|-------------------------------------------|--------|----------------|---------|
|                           | Definition  | Report   | Definition | Report   | Report | Definition            | Report  | Definition                                | Report | Definition     | Report  |
| CTRI/2009/091/001055 [47] | INA         | INA      | INA        | INA      | INA    | INA                   | INA     | INA                                       | INA    | INA            | INA     |
| NCT01054248 [48]          | INA         | Planned  | INA        | Planned  | INA    | INA                   | Planned | INA                                       | INA    | INA            | Planned |
| McGready, 2003a [49]      | NR          | Yes (0)* | NR         | Yes (0)* | Yes    | <37w                  | Yes (0) | NR                                        | NR     | NR             | NR      |
| Adam, 2012 [50]           | <28w        | Yes (0)  | NR         | NR       | NR     | 28-37w                | Yes     | NR                                        | NR     | NR             | NR      |
| Onyamboko, 2011 [51]      | NR          | Yes (0)* | NR         | Yes (0)* | NR     | NR                    | NR      | NR                                        | NR     | NR             | NR      |
| McGready, 2012 [52]       | NR          | Yes (0)* | NR         | Yes (0)* | Yes    | NR                    | Yes     | NR                                        | NR     | NR             | Yes (0) |
| Rijken, 2011 [53]         | NR          | Yes (0)* | NR         | Yes (0)* | NR     | NR                    | NR      | NR                                        | NR     | 1 month        | Yes (0) |
| Valea, 2014 [54]          | NR          | NR       | NR         | NR       | NR     | NR                    | NR      | NR                                        | NR     | NR             | NR      |
| Adam, 2004b [60]          | <28w        | Yes      | NR         | NR       | NR     | 28-37w                | NR      | from 28 weeks until 1 week after delivery | NR     | NR             | Yes‡    |
| Adam, 2004c [61]          | <28w        | Yes (0)  | NR         | Yes (0)  | NR     | NR                    | Yes     | NR                                        | NR     | NR             | Yes     |
| Adegnika, 2005 [62]       | NR          | NR       | NR         | NR       | NR     | NR                    | NR      | NR                                        | NR     | NR             | NR      |
| Adam, 2006 [63]           | NR          | Yes (0)  | NR         | Yes (0)  | NR     | NR                    | Yes (0) | NR                                        | NR     | NR             | Yes     |
| Ndiaye, 2011 [64]         | NR          | Yes (0)* | NR         | Yes (0)* | Yes    | NR                    | Yes     | NR                                        | NR     | NR             | Yes     |
| McGready, 1998a [66]      | <28w        | Yes      | ≥28w       | Yes      | Yes    | NR                    | NR      | NR                                        | NR     | NR             | NR      |
| McGready, 1998b [67]      | <28w        | Yes      | NR         | Yes      | Yes    | NR                    | NR      | NR                                        | NR     | NR             | Yes (0) |
| McGready, 2001b [68]      | <28w        | Yes      | ≥28w       | Yes      | Yes    | <37w                  | NR      | NR                                        | NR     | NR             | NR      |
| Laochan, 2015 [69]        | NR          | NR       | NR         | NR       | NR     | NR                    | NR      | NR                                        | NR     | NR             | NR      |
| McGready, 2002 [70]       | <28w        | Yes      | ≥28w       | Yes      | Yes    | <37w                  | NR      | NR                                        | NR     | NR             | NR      |
| McGready, 2003b [71]      | NR          | Yes (0)* | NR         | Yes (0)* | Yes    | NR                    | Yes     | NR                                        | NR     | NR             | Yes‡    |
| Rijken, 2008 [73]         | NR          | Yes (0)* | NR         | Yes (0)* | NR     | <37w                  | Yes     | NR                                        | NR     | 1 month        | Yes     |
| Rulisa, 2012 [74]         | NR          | Yes      | NR         | Yes      | NR     | NR                    | Yes     | NR                                        | NR     | ≤ 7 days       | Yes     |
| Kalilani, 2013 [75]       | NR          | NR       | NR         | Yes      | Yes    | <37w                  | Yes     | NR                                        | NR     | NR             | Yes     |

EGA: estimated gestational age at delivery. INA: information not available (conference abstract or registered trial), NR: not reported.

\* No fetal losses were reported. ‡ include deaths after a month. †Total of abortion, stillbirth and neonatal deaths.
