# Supplementary material for: Methodology of assessment and reporting of safety in anti-malarial treatment efficacy studies of uncomplicated falciparum malaria in pregnancy: a systematic literature review
Source: Springer Nature journal article supplement (doi:10.1186/s12936-017-2136-x), 2017-12-01
Supplement: MOESM6 [file 15315546]

Additional file 6 Anthropometric and developmental assessment of the newborns.

| Study                   | Birthweight | Adjustment for |                               |                      | Twins                                                             | Minimal precision of scale | LBW Definition | Reported | Height                      | Length of follow-up after delivery | Developmental test                       |
|-------------------------|-------------|----------------|-------------------------------|----------------------|-------------------------------------------------------------------|----------------------------|----------------|----------|-----------------------------|------------------------------------|------------------------------------------|
|                         |             | Timing         | Sex                           | Gestational age      |                                                                   |                            |                |          |                             |                                    |                                          |
| Naing, 1988 [26]        | No          | NoBW           | NoBW                          | NoBW                 | NR                                                                | NoBW                       | NR             | NR       | NR                          | Not followed                       | -                                        |
| Harinasuta, 1990 [27]   | Yes         | NR             | No                            | No                   | INA                                                               | INA                        | <2500g         | Yes      | INA                         | 6 months                           | Not specified                            |
| Sowunmi, 1998 [29]      | Yes         | NR             | No                            | No                   | NR                                                                | NR                         | NR             | NR       | NR                          | 3 years                            | Yes [71,72]                              |
| Bounyasong, 2001 [30]   | Yes         | 24h            | No                            | No                   | NR                                                                | NR                         | NR             | NR       | NR                          | 2 years                            | Denver developmental screening test [73] |
| McGready, 2000 [31]     | Yes         | NR             | No                            | No                   | Body weight and ega were reported in singletons only.             | 50g                        | NR             | Yes      | Assessed, but not reported. | 1 year                             | Basic developmental milestones           |
| McGready, 2001a [32]    | Yes         | NR             | No                            | No                   | Body weight were reported in singletons only.                     | 50g                        | NR             | Yes      | Assessed, but not reported  | 1 year                             | Developmental milestones                 |
| McGready, 2005 [33]     | Yes         | 24h            | Assessed, No but not reported | No                   | Body weight and ega were reported in singletons only.             | NR                         | <2500g         | Yes      | Yes                         | 1 year                             | Yes [74]                                 |
| Adam, 2004a [34]        | No          | NoBW           | NoBW                          | NoBW                 | NR                                                                | NoBW                       | NR             | NR       | NR                          | NR                                 | -                                        |
| Kalilani, 2007 [35]     | Yes         | 24h            | No                            | No                   | Women with multiple gestations were excluded from the study.      | To the nearest gram        | <2500g         | Yes      | NR                          | Not followed                       | -                                        |
| McGready, 2008 [36]     | Yes         | 72h            | No                            | Term low birthweight | Body weight and ega were reported in singletons only.             | NR                         | <2500g         | Yes      | Yes                         | 1 year                             | Shoklo developmental score [74]          |
| Mutabingwa, 2009 [37]   | Yes         | NR             | No                            | No                   | Women with multiple gestations were excluded from the study.      | NR                         | NR             | NR       | NR                          | 6 weeks                            | Not specified                            |
| Piola, 2010 [39]        | Yes         | NR             | No                            | Term low birthweight | Proportion of multiple births was planned to be reported but not. | NR                         | <2500g         | Yes      | Assessed, but not reported  | 1 year                             | Yes [75]                                 |
| D'Alessandro, 2016 [41] | Yes         | 72h            | No                            | No                   | Analysis of body weight was restricted to singleton births.       | Digital baby scale         | <2500g         | Yes      | NR                          | 1 year                             | Not specified                            |

Additional file 6 continued.

| Study                     | Birthweight | Timing              | Adjustment for             |                 | Twins                                                        | Minimal precision of scale | LBW Definition | Reported | Height                     | Length of follow-up after delivery | Developmental test                  |
|---------------------------|-------------|---------------------|----------------------------|-----------------|--------------------------------------------------------------|----------------------------|----------------|----------|----------------------------|------------------------------------|-------------------------------------|
|                           |             |                     | Sex                        | Gestational age |                                                              |                            |                |          |                            |                                    |                                     |
| Osarfo, 2017 [43]         | Yes         | NR                  | No                         | No              | Women with multiple gestations were excluded from the study. | NR                         | <2500g         | Yes      | Assessed, but not reported | 6 weeks                            | Not specified                       |
| Onyamboko, 2015 [44]      | INA         | INA                 | INA                        | INA             | Women with multiple gestations were excluded from the study. | INA                        | INA            | INA      | INA                        | 1 year                             | Not specified                       |
| Ukah, 2015 [45]           | No          | NoBW                | NoBW                       | NoBW            | NR                                                           | NoBW                       | NR             | NR       | NR                         | Not followed                       | -                                   |
| CTRI/2009/091/001055 [47] | INA         | INA                 | INA                        | INA             | INA                                                          | INA                        | INA            | INA      | INA                        | 42 days                            | Not specified                       |
| NCT01054248 [48]          | Yes         | As soon as possible | Planned                    | No              | INA                                                          | INA                        | INA            | Planned  | Planned                    | 1 year                             | Yes [74]                            |
| McGready, 2003a [49]      | Yes         | <5 days             | Assessed, but not reported | No              | All delivered singleton.                                     | NR                         | <2500g         | Yes      | NR                         | Not followed                       | -                                   |
| Adam, 2012 [50]           | Yes         | NR                  | Assessed, but not reported | No              | NR                                                           | NR                         | <2500g         | Yes      | NR                         | 1 year                             | Neurologic developmental assessment |
| Onyamboko, 2011 [51]      | Yes         | NR                  | No                         | No              | All delivered singleton.                                     | NR                         | ≤2500g         | Yes      | NR                         | 1 year                             | Not specified                       |
| McGready, 2012 [52]       | Yes         | 72h                 | Assessed, but not reported | No              | All delivered singleton.                                     | 10g                        | <2500g         | Yes      | NR                         | 1 year                             | Yes [74]                            |
| Rijken, 2011 [53]         | No          | NoBW                | NoBW                       | NoBW            | All delivered singleton. Birthweight was not reported.       | ± 10g                      | NR             | NR       | Assessed, but not reported | 1 months                           | Not specified                       |
| Valea, 2014 [54]          | Yes         | NR                  | No                         | No              | NR                                                           | 10g                        | <2500g         | NR       | NR                         | Not followed                       | -                                   |
| Adam, 2004b [60]          | Yes         | NR                  | No                         | No              | NR                                                           | NR                         | NR             | NR       | NR                         | 1 year                             | Not specified                       |
| Adam, 2004c [61]          | Yes         | 24h                 | No                         | No              | NR                                                           | NR                         | NR             | NR       | NR                         | 1 year                             | Not specified                       |
| Adegnika, 2005 [62]       | No          | NoBW                | NoBW                       | NoBW            | NR                                                           | NoBW                       | NR             | NR       | NR                         | Not followed                       | -                                   |
| Adam, 2006 [63]           | Yes         | 24h                 | No                         | No              | NR                                                           | NR                         | NR             | NR       | NR                         | 1 month                            | Not specified                       |

Additional file 6 continued.

| Study                | Birthweight                    | Timing | Adjustment for |                             | Twins                                                                                                     | Minimal precision of scale | LBW Definition | Reported | Height | Length of follow-up after delivery | Developmental test                    |
|----------------------|--------------------------------|--------|----------------|-----------------------------|-----------------------------------------------------------------------------------------------------------|----------------------------|----------------|----------|--------|------------------------------------|---------------------------------------|
|                      |                                |        | Sex            | Gestational age             |                                                                                                           |                            |                |          |        |                                    |                                       |
| Ndiaye, 2011 [64]    | Yes                            | 48h    | No             | No                          | NR                                                                                                        | NR                         | NR             | NR       | Yes    | 9 months                           | Not specified                         |
| McGready, 1998a [66] | Yes, in methods but no results | NoBW   | NoBW           | NoBW                        | Twins were included. Birthweight was not reported.                                                        | NoBW                       | <2500g         | NR       | NR     | 1-2 year                           | Not specified                         |
| McGready, 1998b [67] | Yes                            | NR     | No             | No                          | NR                                                                                                        | NR                         | NR             | NR       | NR     | Not followed                       | -                                     |
| McGready, 2001b [68] | Yes                            | NR     | No             | No                          | Body weight and ega were reported in singletons only.                                                     | NR                         | <2500g         | Yes      | NR     | Not followed                       | -                                     |
| Laochan, 2015 [69]   | No                             | NoBW   | NoBW           | NoBW                        | NR                                                                                                        | NoBW                       | NR             | NR       | NR     | Not followed                       | -                                     |
| McGready, 2002 [70]  | Yes                            | NR     | No             | No                          | Body weight and ega were reported in singletons only.                                                     | NR                         | <2500g         | Yes      | NR     | Not followed                       | -                                     |
| McGready, 2003b [71] | Yes                            | NR     | No             | No                          | All delivered singleton.                                                                                  | NR                         | <2500g         | Yes      | NR     | Not followed                       | -                                     |
| Rijken, 2008 [73]    | Yes                            | 3d     | No             | No                          | Body weight was reported in singletons only.                                                              | NR                         | <2500g         | Yes      | NR     | 1 month                            | Not specified                         |
| Rulisa, 2012 [74]    | Yes                            | NR     | No             | Term low birthweight        | Number of twins was reported, but it is unclear whether they were included in birthweight.                | NR                         | NR             | NR       | Yes    | Not specified                      | WHO motor development milestones [76] |
| Kalilani, 2013 [75]  | Yes                            | NR     | Yes*           | Weight for gestational age* | Placental malaria was reported in singletons only. It is unclear for other assessment (e.g. body weight). | NR                         | <2500g         | Yes      | NR     | 14weeks                            | Not specified                         |

ega: estimated gestational age. INA: information not available (conference abstract or registered clinical trial). LBW: low birth weight. NoBW: birth weight was not reported. NR: Not reported (information was not reported in the publication). -: not applicable because newborns were not followed. \*: WHO standard growth curve was used.
