# Supplementary material for: Methodology of assessment and reporting of safety in anti-malarial treatment efficacy studies of uncomplicated falciparum malaria in pregnancy: a systematic literature review
Source: Springer Nature journal article supplement (doi:10.1186/s12936-017-2136-x), 2017-12-01
Supplement: MOESM7 [file 15315546]

Additional file 7 Assessment and reporting of risk factors of adverse pregnancy outcomes.

| Study                       | Smoking          | Marital status | Educational level | Height                | Nutrition status | Chronic diseases                                                                                                                                        |
|-----------------------------|------------------|----------------|-------------------|-----------------------|------------------|---------------------------------------------------------------------------------------------------------------------------------------------------------|
| Naing, 1988 [26]            | NR               | NR             | NR                | NR                    | NR               | NR                                                                                                                                                      |
| Harinasuta, 1990 [27]       | INA              | INA            | INA               | INA                   | INA              | INA                                                                                                                                                     |
| Nosten, 1993 [28]           | NR‡              | NR‡            | NR‡               | NR‡                   | NR‡              | NR‡                                                                                                                                                     |
| Sowunmi, 1998 [29]          | NR               | NR             | NR                | NR                    | NR               | NR                                                                                                                                                      |
| Bounyasong, 2001 [30]       | NR               | NR             | NR                | Yes                   | NR               | NR                                                                                                                                                      |
| McGready, 2000 [31]         | NR               | NR             | NR                | NR                    | NR               | Women with a history of mental disorder excluded.                                                                                                       |
| McGready, 2001a [32]        | NR               | NR             | NR                | NR                    | NR               | Women with major liver or kidney disease were excluded.                                                                                                 |
| McGready, 2005 [33]         | NR               | NR             | NR                | NR                    | NR               | Women with chronic diseases were excluded from the study.                                                                                               |
| Adam, 2004a [34]            | NR               | NR             | NR                | NR                    | NR               | NR                                                                                                                                                      |
| Kalilani, 2007 [35]         | NR               | Yes            | Yes               | NR                    | NR               | Women with a history of chronic disease or pregnancy complications were excluded from the study. HIV status was assessed.                               |
| McGready, 2008 [36]         | Yes              | NR             | NR                | NR                    | BMI              | Women with chronic diseases were excluded from the study.                                                                                               |
| Mutabingwa, 2009 [37]       | NR               | NR             | Yes               | NR                    | NR               | HIV status was assessed. Women with concomitant disease masking assessment of the response to treatment were excluded.                                  |
| Kaye, 2008 [38]             | NR‡              | NR‡            | Yes               | NR‡                   | NR‡              | NR‡                                                                                                                                                     |
| Piola, 2010 [39]            | Recorded but NR. | NR             | NR                | NR                    | NR               | HIV patient was enrolled.                                                                                                                               |
| Carmona-Fonseca, 2013 [40]  | NR‡              | NR‡            | NR‡               | NR‡                   | NR‡              | NR‡                                                                                                                                                     |
| D'Alessandro, 2016 [41, 42] | NR               | NR             | NR                | NR                    | NR               | Women with chronic diseases were excluded. HIV positive patients were enrolled only if she received neither antiretroviral treatment nor cotrimoxazole. |
| Osarfo, 2017 [43]           | NR               | NR             | Yes               | Yes, but not reported | NR               | Women with chronic diseases (diabetes, hypertension, renal/cardiac) or HIV were excluded from the study.                                                |
| Onyamboko, 2015 [44]        | INA              | INA            | INA               | INA                   | INA              | HIV positive women and women with medical conditions requiring concomitant drug treatment were excluded from the study.                                 |
| Ukah, 2015 [45]             | NR               | NR             | NR                | NR                    | NR               | HIV was assessed and reported.                                                                                                                          |
| Iribhogbe, 2017a [46]       | NR‡              | NR‡            | NR‡               | Yes                   | BMI              | Women with known severe underlying diseases were excluded from the study.‡                                                                              |
| CTRI/2009/091/001055 [47]   | INA              | INA            | INA               | INA                   | INA              | Women with known chronic diseases were excluded from the study.                                                                                         |
| NCT01054248 [48]            | Yes              | INA            | Yes (literacy)    | Yes                   | INA              | Women with a history or known liver diseases or other chronic diseases were excluded.                                                                   |
| McGready, 2003a [49]        | NR               | NR             | NR                | NR                    | NR               | Women with chronic diseases were excluded from the study.                                                                                               |
| Adam, 2012 [50]             | NR               | NR             | NR                | Yes                   | NR               | Women with chronic diseases were excluded.                                                                                                              |
| Onyamboko, 2011 [51]        | NR               | NR             | Yes               | Yes                   | BMI              | Women with chronic diseases (diabetes, hypertension, etc.) or HIV were excluded.                                                                        |

Additional file 7 continued.

| Study                    | Smoking                | Marital status | Educational level | Height | Nutrition status | Chronic diseases                                                                                                   |
|--------------------------|------------------------|----------------|-------------------|--------|------------------|--------------------------------------------------------------------------------------------------------------------|
| McGready, 2012 [52]      | Yes                    | NR             | NR                | NR     | BMI              | NR                                                                                                                 |
| Rijken, 2011 [53]        | Yes                    | NR             | NR                | Yes    | NR               | NR                                                                                                                 |
| Valea, 2014 [54]         | NR                     | Yes            | Yes               | Yes    | BMI              | Patients with chronic medical conditions requiring special care beyond what the study could provide were excluded. |
| Juma, 2014 [55]          | INA                    | INA            | INA               | INA    | INA              | Patients with a history of heart disease or arrhythmia were excluded.                                              |
| Mosha, 2014 [56]         | No history of smoking. | NR‡            | NR‡               | Yes    | BMI              | No history of chronic disease.                                                                                     |
| Nyunt, 2016 [57]         | NR‡                    | NR‡            | NR‡               | NR     | BMI              | Women with significant other illness including HIV were excluded from the study. ‡                                 |
| Mutagonda, 2016 [58, 59] | NR‡                    | NR‡            | NR‡               | NR‡    | NR‡              | NR‡                                                                                                                |
| Adam, 2004b [60]         | NR                     | NR             | NR                | NR     | NR               | NR                                                                                                                 |
| Adam, 2004c [61]         | NR                     | NR             | NR                | NR     | NR               | NR                                                                                                                 |
| Adegnika, 2005 [62]      | NR                     | NR             | NR                | NR     | NR               | NR                                                                                                                 |
| Adam, 2006 [63]          | NR                     | NR             | NR                | NR     | NR               | NR                                                                                                                 |
| Ndiaye, 2011 [64]        | NR                     | NR             | NR                | NR     | NR               | Patients with underlying hepatic or renal illness were excluded.                                                   |
| Iribhogbe, 2017b [65]    | NR‡                    | NR‡            | NR‡               | Yes    | BMI              | Women with known severe underlying diseases were excluded from the study. ‡                                        |
| McGready, 1998a [66]     | NR                     | NR             | NR                | NR     | NR               | NR                                                                                                                 |
| McGready, 1998b [67]     | NR                     | NR             | NR                | Yes    | NR               | NR                                                                                                                 |
| McGready, 2001b [68]     | NR                     | NR             | NR                | NR     | NR               | NR                                                                                                                 |
| Laochan, 2015 [69]       | NR‡                    | NR‡            | NR‡               | NR‡    | NR‡              | NR‡                                                                                                                |
| McGready, 2002 [70]      | NR                     | NR             | NR                | NR     | NR               | NR                                                                                                                 |
| McGready, 2003b [71]     | NR                     | NR             | NR                | NR     | NR               | NR                                                                                                                 |
| Villegas, 2005 [72]      | INA                    | INA            | INA               | INA    | INA              | INA                                                                                                                |
| Rijken, 2008 [73]        | NR                     | NR             | NR                | NR     | NR               | NR                                                                                                                 |
| Rulisa, 2012 [74]        | NR                     | NR             | NR                | NR     | NR               | Diabetes was reported                                                                                              |
| Kalilani, 2013 [75, 76]  | NR                     | Yes            | Yes               | NR     | NR               | Patients with major illness and HIV-positive patients receiving cotrimoxazole were excluded from the study.        |

INA: information not available (conference abstract or registered clinical trial). NR: not reported. ‡: pregnancy outcomes were not reported.
